# Supplementary material for: ANCA-associated glomerulonephritis and lupus nephritis following COVID-19 vaccination: a case report and literature review
Source: PubMed Central journal article supplement (PMC10828972; doi:10.3389/fimmu.2023.1298622), 2024-01-08
Supplement: DataSheet_2.pdf [file DataSheet_2.pdf]

### Search terms

Bibliographic search was carried in PUBMED/MEDLINE, PUBCOVID19, and GOOGLE SCHOLAR databases. The keywords related to “Glomerular”, “Glomerulopathy”, “Kidney”, “Tubular”, “proteinuria,” and “COVID-19”, “SARS-CoV-2”, and “SARS-CoV vaccine” were used with Boolean combination
